# Supplementary material for: GEM: a dynamic tracking model for mesoscale eddies in the ocean
Source: Copernicus journal article supplement (doi:10.5194/os-12-1249-2016), 2016-12-02
Supplement: Supplementary file 1 [file os-12-1249-2016-supplement.zip]

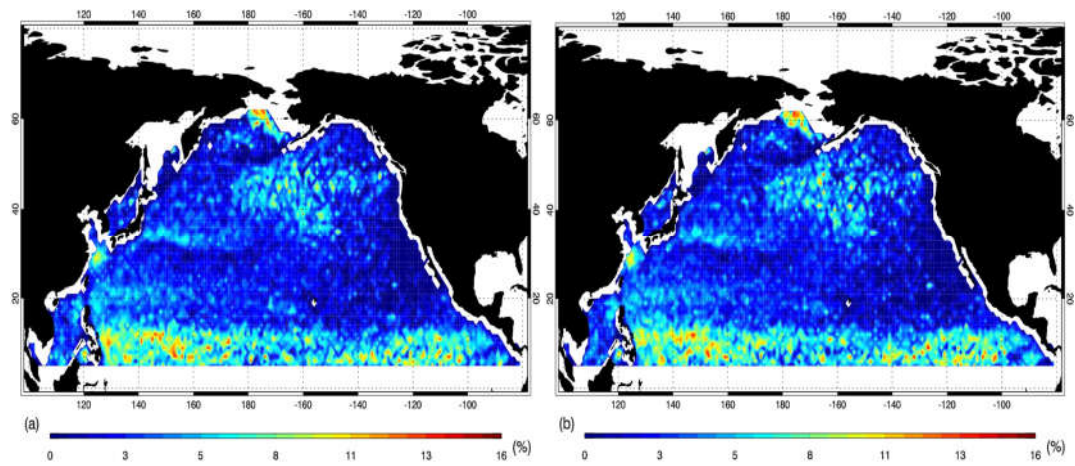

Figure S1 The frequency of dynamic al processes, normalized by the number of eddy. (a) The merging frequency for cyclonic eddies. (b) The splitting frequency for cyclonic eddies.
