# Supplementary material for: GEM: a dynamic tracking model for mesoscale eddies in the ocean
Source: Copernicus journal article supplement (doi:10.5194/os-12-1249-2016), 2016-12-02
Supplement: Supplementary file 2 [file os-12-1249-2016-supplement.zip]

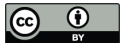

## *Supplement of*

# **GEM: a dynamic tracking model for mesoscale eddies in the ocean**

**Qiu-Yang Li et al.**

*Correspondence to:* Liang Sun (sunl@ustc.edu.cn)

- os-12-1249-2016-supplement-title-page.pdf
- Eddytrack-V03-20161114.zip
- Figure S1.pdf
- Figure11-19970420-GEM.gif
- GEM-Program manual V03.pdf
- Supplement.docx

The copyright of individual parts of the supplement might differ from the CC-BY 3.0 licence.
