# Supplementary material for: GEM: a dynamic tracking model for mesoscale eddies in the ocean
Source: Copernicus journal article supplement (doi:10.5194/os-12-1249-2016), 2016-12-02
Supplement: Supplementary file 4 [file os-12-1249-2016-supplement.zip]

Archive with 6 entries (6 files):
- GEM-Program manual V03.pdf
- Supplement.docx
- Eddytrack-V03-20161114.zip
- os-12-1249-2016-supplement-title-page.pdf
- Figure S1.pdf
- Figure11-19970420-GEM.gif
