# Supplementary material for: GEM: a dynamic tracking model for mesoscale eddies in the ocean
Source: Copernicus journal article supplement (doi:10.5194/os-12-1249-2016), 2016-12-02
Supplement: Supplementary file 4 [file os-12-1249-2016-supplement.zip › Supplement.docx]

Supplement of

GEM: a dynamic tracking model for mesoscale eddies in the ocean

Qiu-Yang Li et al.

Correspondence to: Liang Sun (sunl@ustc.edu.cn)

• OS-12-2016-supplement-title-page.pdf

• Figure S1.pdf

• Figure11-19970420-GEM.gif

• GEM-Program manual V03.pdf

• Eddytrack-V03-20161114.zip

The copyright of individual parts of the supplement might differ from the CC-BY 3.0 licence.
