# Supplementary figures and images for: GEM: a dynamic tracking model for mesoscale eddies in the ocean
Source: Copernicus journal article supplement (doi:10.5194/os-12-1249-2016), 2016-12-02

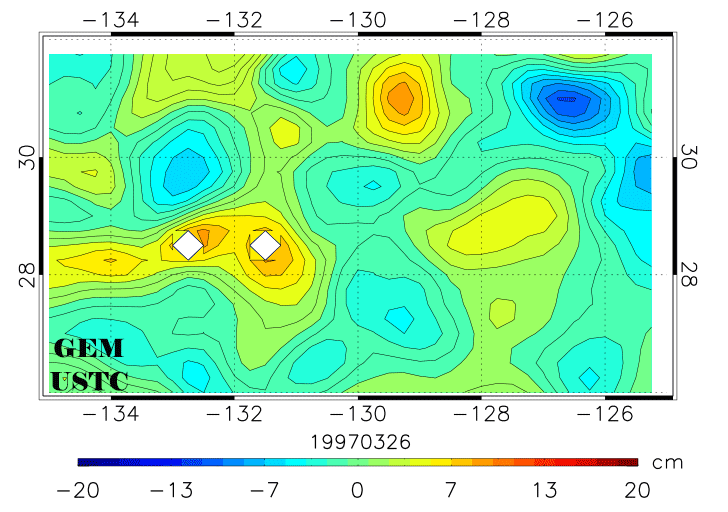

Supplement: Supplementary file 4 [file os-12-1249-2016-supplement.zip › Figure11-19970420-GEM.gif]
